# Supplementary material for: NMR metabolomics of cerebrospinal fluid differentiates inflammatory diseases of the central nervous system
Source: PubMed Central journal article supplement (PMC6312347; doi:10.1371/journal.pntd.0007045), 2018-12-17
Supplement: pntd.0007045.s001.pdf [file pntd.0007045.s001.pdf]

**S1 Table. Concentrations ( $\mu\text{M}$ ) of metabolites in cerebrospinal fluid by infection status measured by  $^1\text{H}$  NMR spectroscopy**

| Metabolite           | No Infection |                     | Infection |                     |
|----------------------|--------------|---------------------|-----------|---------------------|
|                      | Median       | (IQR)               | Median    | (IQR)               |
| 2-Hydroxybutyrate    | 33.89        | (12.48)             | 59.78     | (64.67)             |
| 2-Hydroxyisovalerate | 5.34         | (3.20)              | 7.27      | (5.83)              |
| 2-Oxoglutarate       | 1.78         | (2.33) <sup>a</sup> | 2.89      | (2.61) <sup>a</sup> |
| 2-Oxoisocaproate     | 1.22         | (0.56) <sup>a</sup> | 1.78      | (1.90) <sup>a</sup> |
| 3-Hydroxybutyrate    | 7.22         | (6.49)              | 48.78     | (185.72)            |
| 3-Hydroxyisobutyrate | 13.67        | (4.14)              | 18.44     | (9.46)              |
| 3-Hydroxyisovalerate | 2.65         | (1.83)              | 3.89      | (3.09)              |
| Acetamide            | 2.33         | (1.22) <sup>a</sup> | 2.00      | (2.83) <sup>a</sup> |
| Acetate              | 106.65       | (35.49)             | 59.78     | (66.81)             |
| Acetoacetate         | 6.22         | (2.98)              | 22.44     | (71.39)             |
| Acetone              | 4.18         | (9.99)              | 24.67     | (80.56)             |
| Alanine              | 26.33        | (10.67)             | 31.33     | (28.18)             |
| Betaine              | 2.44         | (0.78) <sup>a</sup> | 3.56      | (1.60) <sup>a</sup> |
| Carnitine            | 1.69         | (0.97) <sup>a</sup> | 3.44      | (2.22) <sup>a</sup> |
| Choline              | 1.89         | (0.76)              | 2.67      | (2.66)              |
| Citrate              | 172.11       | (40.59)             | 185.33    | (106.71)            |
| Creatine             | 45.19        | (8.69)              | 49.11     | (18.23)             |
| Creatinine           | 51.56        | (14.66)             | 49.78     | (21.71)             |
| Dimethyl sulfone     | 3.80         | (2.61)              | 3.22      | (3.51)              |
| Ethanolamine         | 16.11        | (5.46)              | 14.49     | (10.67)             |
| Formate              | 26.86        | (9.78)              | 45.22     | (27.69)             |
| Fructose             | 124.67       | (53.13)             | 80.44     | (41.67)             |
| Fucose               | 3.89         | (2.19) <sup>a</sup> | 3.78      | (2.49) <sup>a</sup> |
| Glucose              | 3294.73      | (722.07)            | 2993.24   | (1787.33)           |
| Glutamate            | 2.82         | (3.01) <sup>a</sup> | 8.48      | (8.33) <sup>a</sup> |
| Glutamine            | 443.99       | (99.01)             | 389.78    | (283.67)            |
| Glycine              | 4.88         | (2.53) <sup>a</sup> | 13.71     | (15.99)             |
| Glycolate            | 8.22         | (2.19)              | 8.44      | (3.67)              |

**S1 Table (continued)**

| <b>Metabolite</b>     | <b>No Infection</b> |                     | <b>Infection</b> |                     |
|-----------------------|---------------------|---------------------|------------------|---------------------|
|                       | Median              | (IQR)               | Median           | (IQR)               |
| Isobutyrate           | 1.27                | (1.67)              | 0.79             | (0.67)              |
| Isoleucine            | 4.51                | (1.38)              | 5.44             | (3.75)              |
| Isopropanol           | 2.00                | (1.42)              | 9.56             | (8.00)              |
| Lactate               | 1542.75             | (316.08)            | 1814.11          | (1019.14)           |
| Leucine               | 10.95               | (3.45)              | 13.78            | (9.85)              |
| Lysine                | 20.00               | (8.67)              | 19.22            | (8.16)              |
| Methanol <sup>b</sup> | 19.96               | (11.52)             | 14.33            | (9.06)              |
| Methionine            | 3.02                | (1.27) <sup>a</sup> | 3.11             | (3.46) <sup>a</sup> |
| N-acetylaspartate     | 0.93                | (0.56) <sup>a</sup> | 1.44             | (1.06) <sup>a</sup> |
| N-acetylneuraminate   | 16.33               | (7.33)              | 11.50            | (6.18)              |
| NAAG                  | 1.55                | (1.33)              | 1.08             | (1.20)              |
| Ornithine             | 3.31                | (1.89) <sup>a</sup> | 4.56             | (4.60) <sup>a</sup> |
| Phenylalanine         | 8.44                | (4.75)              | 13.16            | (8.43)              |
| Propionate            | 1.93                | (1.38) <sup>a</sup> | 1.89             | (1.48) <sup>a</sup> |
| Pyroglutamate         | 19.44               | (7.34)              | 61.33            | (81.25)             |
| Pyruvate              | 28.05               | (44.13)             | 77.78            | (81.50)             |
| Quinolate             | 1.08                | (1.63) <sup>a</sup> | 3.09             | (3.17) <sup>a</sup> |
| Serine                | 33.43               | (11.83)             | 23.56            | (11.27)             |
| Threonine             | 31.96               | (16.22)             | 31.11            | (21.14)             |
| Tyrosine              | 10.91               | (4.86)              | 10.70            | (7.55)              |
| Urea                  | 1947.89             | (1220.18)           | 2719.23          | (2441.61)           |
| Valine                | 15.41               | (5.59)              | 19.00            | (13.86)             |
| myo-Inositol          | 118.78              | 52.67               | 99.51            | (39.93)             |

Abbreviations: IQR, interquartile range

<sup>a</sup>Median concentrations are not accurate due to concentrations for many samples being below the detection limit.

<sup>b</sup>Tentatively assigned due to having only one quantifiable peak and unexplained chemical shift in the NMR spectra.
