# Supplementary material for: NMR metabolomics of cerebrospinal fluid differentiates inflammatory diseases of the central nervous system
Source: PubMed Central journal article supplement (PMC6312347; doi:10.1371/journal.pntd.0007045), 2018-12-17
Supplement: pntd.0007045.s002.pdf [file pntd.0007045.s002.pdf]

**S2 Table.** Concentrations ( $\mu\text{M}$ ) of metabolites in cerebrospinal fluid by diagnosis

| Metabolite                    | Control |         | Multiple Sclerosis |          | West Nile Virus |          | Lyme   |          | Rabies |          | Fungal |         |
|-------------------------------|---------|---------|--------------------|----------|-----------------|----------|--------|----------|--------|----------|--------|---------|
|                               | Median  | (IQR)   | Median             | (IQR)    | Median          | (IQR)    | Median | (IQR)    | Median | (IQR)    | Median | (IQR)   |
| 2-Hydroxybutyrate             | 32.68   | (13.02) | 39.11              | (13.83)  | 133.67          | (85.11)  | 42.56  | (25.72)  | 62.06  | (44.56)  | 24.33  | (11.94) |
| 2-Hydroxyisovalerate          | 5.00    | (3.20)  | 5.67               | (2.25)   | 10.56           | (0.33)   | 4.78   | (1.66)   | 9.03   | (9.35)   | 4.67   | (0.83)  |
| 2-Oxoglutarate <sup>a</sup>   | 1.78    | (2.33)  | 1.11               | (0.56)   | 4.89            | (4.44)   | 3.67   | (3.33)   | 2.40   | (1.31)   | 1.44   | (0.00)  |
| 2-Oxoisocaproate <sup>a</sup> | 1.25    | (0.66)  | 1.17               | (0.31)   | 2.67            | (2.44)   | 1.78   | (0.78)   | 1.81   | (1.67)   | 1.11   | (0.44)  |
| 3-Hydroxybutyrate             | 7.41    | (11.29) | 7.17               | (0.67)   | 259.00          | (312.89) | 48.78  | (36.00)  | 68.17  | (197.77) | 15.44  | (19.00) |
| 3-Hydroxyisobutyrate          | 13.67   | (4.26)  | 13.72              | (1.81)   | 22.33           | (6.56)   | 10.67  | (5.82)   | 22.74  | (6.33)   | 17.67  | (3.83)  |
| 3-Hydroxyisovalerate          | 2.65    | (1.83)  | 2.94               | (1.86)   | 6.44            | (3.00)   | 2.33   | (0.42)   | 4.32   | (3.06)   | 4.00   | (0.67)  |
| Acetamide <sup>a</sup>        | 2.17    | (1.29)  | 2.44               | (0.50)   | 2.89            | (3.00)   | 4.11   | (0.93)   | 1.32   | (1.19)   | 5.00   | (3.22)  |
| Acetate                       | 106.65  | (27.13) | 96.72              | (107.19) | 33.78           | (10.22)  | 59.78  | (28.89)  | 83.39  | (66.37)  | 85.33  | (91.61) |
| Acetoacetate                  | 6.39    | (4.88)  | 5.61               | (1.33)   | 75.33           | (106.11) | 26.22  | (11.03)  | 24.63  | (92.11)  | 1.89   | (3.89)  |
| Acetone                       | 4.75    | (10.47) | 3.61               | (0.97)   | 98.89           | (39.11)  | 25.56  | (14.57)  | 22.90  | (164.52) | 7.22   | (3.28)  |
| Alanine                       | 25.10   | (9.63)  | 31.44              | (4.50)   | 40.67           | (29.44)  | 29.11  | (3.89)   | 29.89  | (26.54)  | 35.00  | (17.39) |
| Betaine <sup>a</sup>          | 2.45    | (0.72)  | 2.22               | (0.50)   | 5.11            | (2.56)   | 3.44   | (0.33)   | 2.90   | (2.33)   | 3.56   | (0.17)  |
| Carnitine <sup>a</sup>        | 1.67    | (0.75)  | 2.50               | (0.53)   | 4.22            | (0.33)   | 2.78   | (1.11)   | 1.62   | (2.06)   | 3.44   | (2.72)  |
| Choline                       | 1.89    | (0.84)  | 2.00               | (0.75)   | 4.22            | (1.78)   | 3.00   | (0.56)   | 2.10   | (1.77)   | 5.78   | (2.33)  |
| Citrate                       | 169.44  | (40.88) | 190.17             | (50.86)  | 178.67          | (99.22)  | 185.33 | (124.34) | 180.87 | (77.58)  | 252.78 | (44.22) |
| Creatine                      | 45.19   | (11.69) | 46.06              | (4.50)   | 49.56           | (15.67)  | 47.00  | (15.44)  | 42.63  | (10.74)  | 62.00  | (9.06)  |
| Creatinine                    | 51.56   | (12.85) | 56.17              | (17.56)  | 48.11           | (32.11)  | 50.22  | (4.11)   | 47.90  | (24.38)  | 79.67  | (40.94) |

S2 Table (continued)

| Metabolite              | Control |                     | Multiple Sclerosis |                     | West Nile Virus |           | Lyme    |          | Rabies  |           | Fungal  |          |
|-------------------------|---------|---------------------|--------------------|---------------------|-----------------|-----------|---------|----------|---------|-----------|---------|----------|
|                         | Median  | (IQR)               | Median             | (IQR)               | Median          | (IQR)     | Median  | (IQR)    | Median  | (IQR)     | Median  | (IQR)    |
| Dimethyl sulfone        | 3.67    | (2.44)              | 7.94               | (1.42)              | 5.67            | (2.00)    | 3.89    | (1.22)   | 1.54    | (1.61)    | 7.56    | (3.44)   |
| Ethanolamine            | 16.13   | (5.44)              | 12.22              | (4.97)              | 20.22           | (12.89)   | 15.89   | (8.67)   | 10.47   | (12.24)   | 14.67   | (0.67)   |
| Formate                 | 25.76   | (8.80)              | 40.33              | (21.39)             | 73.11           | (31.00)   | 61.33   | (23.56)  | 31.80   | (3.38)    | 45.22   | (2.17)   |
| Fructose                | 125.55  | (60.64)             | 118.11             | (18.56)             | 87.11           | (4.67)    | 58.78   | (25.93)  | 85.94   | (96.52)   | 79.67   | (26.06)  |
| Fucose <sup>a</sup>     | 3.99    | (2.14)              | 2.06               | (2.47)              | 4.33            | (0.89)    | 1.84    | (2.00)   | 3.97    | (3.14)    | 3.22    | (6.17)   |
| Glucose                 | 3345.44 | (453.63)            | 2530.83            | (211.92)            | 3240.56         | (746.22)  | 2400.78 | (380.10) | 4128.06 | (755.06)  | 2205.11 | (400.61) |
| Glutamate <sup>a</sup>  | 3.01    | (2.25)              | 0.89               | (1.64)              | 15.67           | (53.44)   | 11.78   | (6.44)   | 6.29    | (3.43)    | 8.67    | (3.39)   |
| Glutamine               | 445.56  | (105.63)            | 414.72             | (51.56)             | 240.00          | (327.89)  | 288.11  | (117.46) | 519.33  | (209.91)  | 261.67  | (267.00) |
| Glycine                 | 4.88    | (2.27) <sup>b</sup> | 5.94               | (2.67) <sup>a</sup> | 19.22           | (8.56)    | 15.56   | (8.00)   | 10.13   | (21.79)   | 6.22    | (0.89)   |
| Glycolate               | 8.67    | (2.19)              | 7.67               | (1.33)              | 8.44            | (1.00)    | 8.22    | (1.56)   | 6.70    | (3.55)    | 10.78   | (7.22)   |
| Isobutyrate             | 1.27    | (0.86)              | 1.83               | (1.83)              | 1.22            | (0.33)    | 0.67    | (0.22)   | 0.78    | (0.43)    | 1.56    | (0.94)   |
| Isoleucine              | 4.33    | (1.28)              | 5.33               | (1.00)              | 6.33            | (5.67)    | 5.44    | (1.89)   | 5.15    | (4.26)    | 4.33    | (2.22)   |
| Isopropanol             | 1.81    | (1.41)              | 2.50               | (1.33)              | 4.89            | (7.00)    | 13.11   | (3.78)   | 9.87    | (6.58)    | 4.33    | (2.89)   |
| Lactate                 | 1542.75 | (316.08)            | 1554.33            | (208.31)            | 2717.11         | (1690.56) | 1716.44 | (125.78) | 2072.21 | (1142.34) | 1511.11 | (185.83) |
| Leucine                 | 10.95   | (4.20)              | 11.06              | (2.72)              | 14.11           | (16.22)   | 13.78   | (2.78)   | 13.44   | (10.16)   | 11.00   | (2.67)   |
| Lysine                  | 19.85   | (8.91)              | 20.78              | (2.22)              | 19.22           | (2.33)    | 15.44   | (4.38)   | 19.85   | (11.95)   | 22.56   | (7.22)   |
| Methanol <sup>c</sup>   | 20.78   | (10.07)             | 12.00              | (12.89)             | 9.56            | (8.78)    | 14.44   | (0.44)   | 16.71   | (12.54)   | 13.44   | (3.28)   |
| Methionine <sup>a</sup> | 3.10    | (1.21)              | 2.56               | (1.22)              | 2.67            | (3.78)    | 1.89    | (0.89)   | 4.23    | (5.21)    | 3.11    | (0.72)   |

**S2 Table** (continued)

| Metabolite                     | Control |                     | Multiple Sclerosis |                     | West Nile Virus |                     | Lyme    |                     | Rabies  |                     | Fungal  |           |
|--------------------------------|---------|---------------------|--------------------|---------------------|-----------------|---------------------|---------|---------------------|---------|---------------------|---------|-----------|
|                                | Median  | (IQR)               | Median             | (IQR)               | Median          | (IQR)               | Median  | (IQR)               | Median  | (IQR)               | Median  | (IQR)     |
| N-acetylaspartate <sup>a</sup> | 0.93    | (0.60)              | 0.89               | (0.31)              | 0.89            | (1.00)              | 1.44    | (0.33)              | 1.39    | (1.44)              | 1.67    | (0.50)    |
| N-acetylneuraminate            | 17.89   | (6.50)              | 13.78              | (1.97)              | 10.89           | (2.00)              | 11.50   | (6.56)              | 13.33   | (3.68)              | 22.44   | (12.83)   |
| NAAG                           | 2.05    | (1.00)              | 0.72               | (0.19)              | 2.11            | (0.89)              | 1.15    | (1.00)              | 0.97    | (0.52)              | 1.00    | (0.50)    |
| Ornithine                      | 3.71    | (1.85) <sup>b</sup> | 1.89               | (2.61) <sup>a</sup> | 2.44            | (2.22) <sup>b</sup> | 4.56    | (0.89) <sup>b</sup> | 4.69    | (3.69) <sup>b</sup> | 9.11    | (2.33)    |
| Phenylalanine                  | 9.56    | (4.82)              | 7.17               | (1.72)              | 17.22           | (6.11)              | 8.56    | (4.22)              | 14.60   | (4.99)              | 9.11    | (10.39)   |
| Propionate <sup>a</sup>        | 1.67    | (0.74)              | 6.94               | (8.50)              | 2.00            | (0.44)              | 2.89    | (2.00)              | 1.67    | (1.33)              | 1.89    | (0.39)    |
| Pyroglutamate                  | 20.40   | (7.35)              | 16.39              | (3.25)              | 89.44           | (32.56)             | 65.00   | (118.00)            | 31.15   | (21.57)             | 146.78  | (192.06)  |
| Pyruvate                       | 28.05   | (41.51)             | 39.83              | (47.75)             | 195.11          | (48.11)             | 54.67   | (18.04)             | 80.73   | (75.16)             | 9.44    | (17.17)   |
| Quinolate <sup>a</sup>         | 1.03    | (1.23)              | 1.89               | (1.14)              | 4.67            | (2.67)              | 3.44    | (2.11)              | 1.80    | (3.60)              | 3.44    | (1.67)    |
| Serine                         | 32.84   | (11.50)             | 37.67              | (10.17)             | 23.56           | (6.56)              | 27.33   | (8.19)              | 22.00   | (18.29)             | 17.11   | (3.22)    |
| Threonine                      | 35.51   | (19.35)             | 27.72              | (4.64)              | 33.67           | (36.67)             | 27.89   | (7.33)              | 32.93   | (21.22)             | 30.22   | (11.83)   |
| Tyrosine                       | 11.84   | (4.14)              | 9.56               | (2.25)              | 10.11           | (3.89)              | 6.56    | (1.22)              | 11.93   | (8.47)              | 8.11    | (18.56)   |
| Urea                           | 1893.19 | (997.62)            | 2547.61            | (802.39)            | 2129.44         | (3278.89)           | 2397.11 | (506.22)            | 3025.47 | (2987.82)           | 4554.56 | (5698.22) |
| Valine                         | 15.41   | (5.59)              | 16.00              | (4.78)              | 28.56           | (22.56)             | 19.00   | (9.33)              | 16.62   | (13.76)             | 19.56   | (4.72)    |
| myo-Inositol                   | 118.78  | (54.40)             | 103.11             | (50.64)             | 86.44           | (36.56)             | 97.33   | (31.67)             | 106.49  | (38.70)             | 137.89  | (52.11)   |

Abbreviations: IQR, interquartile range

<sup>a</sup>Median concentrations are not accurate due to concentrations for many samples being below the detection limit.

<sup>b</sup>Tentatively assigned due to having only one quantifiable peak and unexplained chemical shift in the NMR spectra.
